# Supplementary material for: Duration of untreated psychosis and pathways to care in Suriname: a qualitative study among patients, relatives and general practitioners
Source: HighWire-hosted journal article supplement (doi:10.1136/bmjopen-2021-050731), 2022-02-01
Supplement: bmjopen-2021-050731supp003_data_supplement.pdf [file bmjopen-2021-050731supp003_data_supplement.pdf]

## Interview physician

### General

1. Age: ...
2. Gender:
  - Female
  - Male
  - Other, ...
3. Occupation: ...
4. Years in occupation: ...

### Introduction

Firstly, we would like to thank you for being here and for being part of this research. Before we start we would like to introduce ourselves. Our names are [Menno de Leeuw] [Atousa van Beek] [Mia Poplawska] [Lise Kerkvliet] and we are medical students from the Netherlands. For our studies we have set up this research here. For our research we will be looking into experiences and difficulties encountered from people who have had psychosis, but also the opinions of the patient's family and treating physicians. Therefore, we are very glad that you are willing to share your story with us.

We would like to understand more about the possible reasons for a long Duration of Untreated Psychosis (DUP) and how we could help to reduce this. We decided to define this time as the time between the patient presenting with symptoms and receiving treatment from a healthcare professional.

We want to know more about your experience with treating patients with psychosis. We might ask some specific questions about (patient) but will mainly take a more wide-scale approach.

Just as a reminder we would like to let you know that this interview will be recorded. Only people involved in the study such as ourselves and dr. Nanda and dr. Veling will be able to access these recordings. Everything we talk about today will be confidential and treated anonymously.

Do you have any questions for us?

Then we would like to get started.

### Psychosis

1. How many patients presenting with psychosis do you see on a yearly basis (estimate)?
2. What are the most common symptoms you see among your patients presenting with psychosis?

3. Patients can wait a long time before presenting to a doctor with their psychotic symptoms.
  - a. How long do patients usually wait before seeing you?
  - b. In your experience, what are reasons for a long DUP (duration of untreated psychosis – waiting a long period of time before seeing a doctor)
    - i. Do you think distance is an important factor?
    - ii. Do you think costs are an important factor?
    - iii. Do you think the absence of social support is an important factor?
    - iv. Do you think a low educational level is an important factor?
    - v. Do you think a lack of knowledge (patient) is an important factor?
    - vi. Do you think a lack of self-awareness is an important factor?
    - vii. Do you think that searching for alternative medicine is an important factor?
    - viii. Do you think that stigma is an important factor? (mental health, the pcs)
4. Based on your experience and knowledge, what are the most common causes of psychosis among your patients?
  - a. Perspective of the patient
  - b. Perspective of the physician

### **Knowledge of physicians about psychosis**

1. How were you trained to recognise (symptoms of) psychosis?

### **Actions by physicians regarding psychosis**

1. Could you tell us what you do when you see a patient with symptoms of psychosis for the first time
2. What causes you to refer a patient to a psychiatrist?
3. Do patients generally see you first when they have symptoms or do they go to the pcs directly?

### **Traditional and alternative medicine**

1. What is your view on traditional medicine?
2. Do you often see patients (with psychotic symptoms) who have first visited traditional healer before seeing you?
3. Do you have contact with traditional healers? Do you collaborate with them?

### **Other**

1. From the data we collect via these interviews we are going to try and produce a product to help shorten the DUP. For this, we would really like to know what you believe, as a professional, is needed to improve the time before your patients receive treatment?

- a. Do you think it will be useful to offer a short educational programme about psychosis for GPs?
- b. Do you think it will be useful to make a short video which informs people about what a psychosis is, how to recognise it and where to go for help?

2019, Suriname Research. Menno de Leeuw, Atousa van Beek, Mia Poplawska, Lise Kerkvliet.
